# Supplementary material
Source: Royal Society of Chemistry journal article supplement (doi:10.1039/d6cp01247g)
Supplement: d6cp01247g1.pdf [file d6cp01247g1.pdf]

*Supplement of*

# **Theoretical study of the reaction mechanisms and kinetics of acetyl and hydroperoxyl radicals: Implications for atmospheric chemistry**

Weikang Xiao<sup>a</sup>, Ling Liu<sup>a</sup>, Fengyang Bai<sup>\*,a,b</sup>, Shaowen Zhang<sup>\*,a</sup>, and Xiuhui Zhang<sup>\*,a</sup>

<sup>a</sup> State Key Laboratory of Environment Characteristics and Effects for Near-space, Key Laboratory of Cluster Science, Ministry of Education of China, School of Chemistry and Chemical Engineering, Beijing Institute of Technology, Beijing 100081, China

<sup>b</sup> Institute of Catalysis for Energy and Environment, College of Chemistry and Chemical Engineering, Shenyang Normal University, Shenyang 110034, China

---

\*E-mail: [baify492@nenu.edu.cn](mailto:baify492@nenu.edu.cn) (F. Bai), [zhangxiuhui@bit.edu.cn](mailto:zhangxiuhui@bit.edu.cn) (X. Zhang), [swzhang@bit.edu.cn](mailto:swzhang@bit.edu.cn) (S. Zhang).

## Table of Contents

### Contains six figures and twelve tables

**Figure S1.** Potential energy surfaces for  $\text{CH}_3\text{C}(\text{O})\text{O}_2$  radical isomerization reactions. The relative Gibbs free energy ( $\text{kcal mol}^{-1}$  at 298.15 K) was calculated at the CCSD(T)-F12/cc-pVTZ-F12// $\omega$ B97X-D/def2-TZVP level of theory.

**Figure S2.** Branching ratios of *Cis*- $\text{CH}_3\text{C}(\text{O})\text{O}_2$  radical and *Trans*- $\text{CH}_3\text{C}(\text{O})\text{O}_2$  radical in the temperature range of 200–310 K at 1 atm.

**Figure S3.** The contour maps of the electron density difference of key atoms in the transition states of the reaction of  $\text{CH}_3\text{C}(\text{O})\text{O}_2$  radical with  $\text{HO}_2$  radical. Among them, *Cis*- $\text{CH}_3\text{C}(\text{O})\text{O}_2$  related transition states include (TS2, TS4, TS5, TS6, TS7, TS8, TS9), and *Trans*- $\text{CH}_3\text{C}(\text{O})\text{O}_2$  related transition states include (TS10, TS11, TS12, TS13, TS14). Solid and dash lines correspond to positive and negative parts, respectively.

**Figure S4.** Potential energy surfaces for  $\text{CH}_3\text{C}(\text{O})\text{O}_4\text{H}$  isomerization reactions. The relative Gibbs free energy ( $\text{kcal mol}^{-1}$  at 298.15 K) was calculated at the CCSD(T)-F12/cc-pVTZ-F12// $\omega$ B97X-D/def2-TZVP level of theory.

**Figure S5.** The atmospheric lifetime values ( $\tau$ , min) of the  $\text{CH}_3\text{C}(\text{O})\text{O}_2$  radical determined from the  $\text{HO}_2$  radical concentrations ( $[\text{HO}_2]$ ,  $1 \times 10^7 \sim 2 \times 10^7$  molecules  $\text{cm}^{-3}$ ) at different temperatures (200–310 K) in the atmosphere were calculated from apparent rate constants.

**Figure S6.** The atmospheric lifetime values ( $\tau$ , min) of the  $\text{CH}_3\text{C}(\text{O})\text{O}_2$  radical determined from the  $\text{HO}_2$  radical concentrations ( $[\text{HO}_2]$ ,  $0.2 \times 10^8 \sim 1.1 \times 10^8$  molecules  $\text{cm}^{-3}$ ) at different temperatures (200–310 K) in the atmosphere were calculated from apparent rate constants.

**Table S1.** Imaginary frequencies ( $\nu_{\text{im}}$ ) of the transition states (TSs) at the  $\omega$ B97X-D/def2-TZVP level of theory.

**Table S2.** Branching ratios of *Cis*- $\text{CH}_3\text{C}(\text{O})\text{O}_2$  radical, *Trans*- $\text{CH}_3\text{C}(\text{O})\text{O}_2$  radical and Complexes in the temperature range of 200–310 K and 1 atm.

**Table S3.** Reaction rate constants for the isomerization of the  $\text{CH}_3\text{C}(\text{O})\text{O}_2$  radical in the temperature range of 200–310 K and 1 atm. Units of reaction rate constants:  $\text{s}^{-1}$ .

**Table S4.** Rate constant of the favourable initial reaction of the  $\text{CH}_3\text{C}(\text{O})\text{O}_2$  radical with  $\text{HO}_2$  radical in the temperature range of 200–310 K and 1 atm. Units of reaction rate constants:  $\text{s}^{-1}$ .

**Table S5.** Isomerization and decomposition rate constants of the intermediate  $\text{CH}_3\text{C}(\text{O})\text{O}_4\text{H}$  in the temperature range of 200–310 K and 1 atm. Units of reaction rate constants:  $\text{s}^{-1}$ .

**Table S6.** Branching ratios for the reactions of  $\text{CH}_3\text{C}(\text{O})\text{O}_2$  radical with  $\text{HO}_2$  radical in the temperature range of 200–310 K and 1 atm.

**Table S7.** The atmospheric lifetimes ( $\tau$ , min) of  $\text{CH}_3\text{C}(\text{O})\text{O}_2$  radical at different concentrations of  $\text{HO}_2$  radical ( $[\text{HO}_2]$ ,  $1 \times 10^7 \sim 2 \times 10^7$  molecule  $\text{cm}^{-3}$ ) in the temperature range of 200–310 K and 1 atm .

**Table S8.** The atmospheric lifetimes ( $\tau$ , min) of  $\text{CH}_3\text{C}(\text{O})\text{O}_2$  radical at different concentrations of  $\text{HO}_2$  radical ( $[\text{HO}_2]$ ,  $0.2 \times 10^8 \sim 1.1 \times 10^8$  molecule  $\text{cm}^{-3}$ ) in the temperature range of 200–310 K and 1 atm.

**Table S9.** The atmospheric lifetimes ( $\tau$ , min) of  $\text{CH}_3\text{C}(\text{O})\text{O}_2$  radical at different concentrations of  $\text{HO}_2$  radical ( $[\text{HO}_2]$ ,  $1.1 \times 10^8 \sim 6.4 \times 10^8$  molecule  $\text{cm}^{-3}$ ) in the temperature range of 200–310 K and 1 atm.

**Table S10.** The acute and chronic toxicity class. (Unit:  $\text{mg L}^{-1}$ )

**Table S11.** Ecotoxicity ( $\log\text{LC}_{50}$ ,  $\log\text{EC}_{50}$  and  $\text{LogChV}$ ) for  $\text{CH}_3\text{C}(\text{O})\text{O}_2$  radical precursors and its degradation products. (Unit:  $\text{mg L}^{-1}$ )

**Table S12.** Cartesian coordinates of all the studied gaseous molecules optimized at the  $\omega\text{B97X-D/def2-TZVP}$  level of theory.

**Table S13.** Calculated spin contamination values for open-shell key species involved in the reaction pathways.

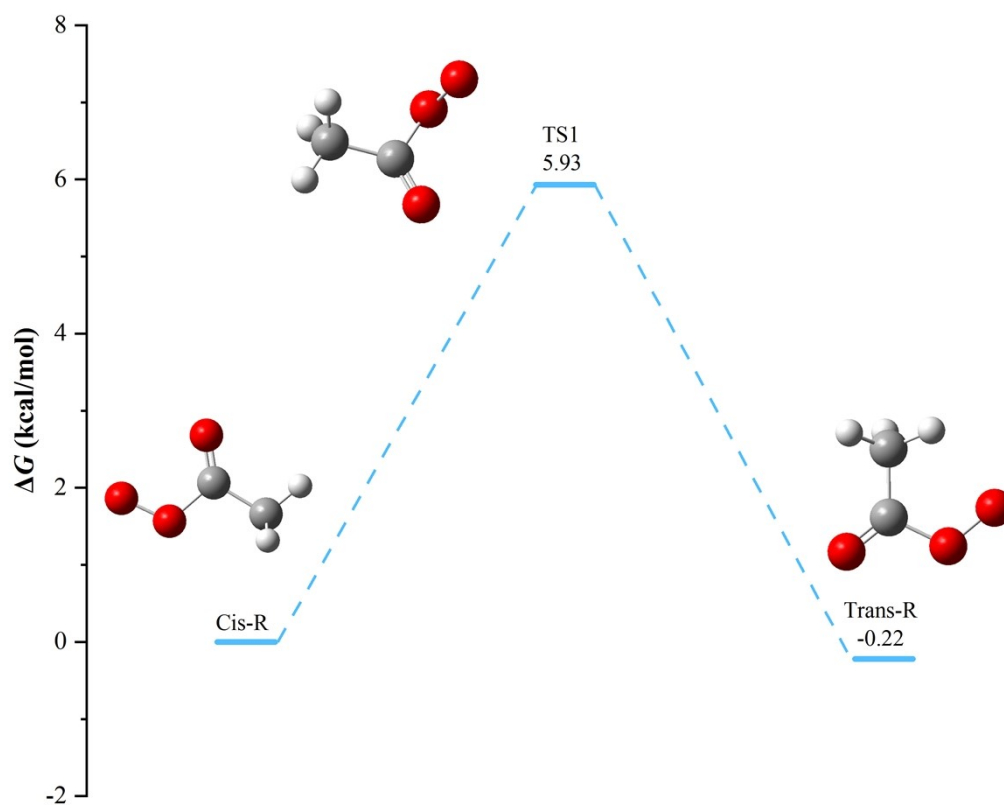

**Figure S1.** Potential energy surfaces for  $\text{CH}_3\text{C}(\text{O})\text{O}_2$  radical isomerization reactions. The relative Gibbs free energy ( $\text{kcal mol}^{-1}$  at 298.15 K) was calculated at the CCSD(T)-F12/cc-pVTZ-F12// $\omega$ B97X-D/def2-TZVP level of theory.

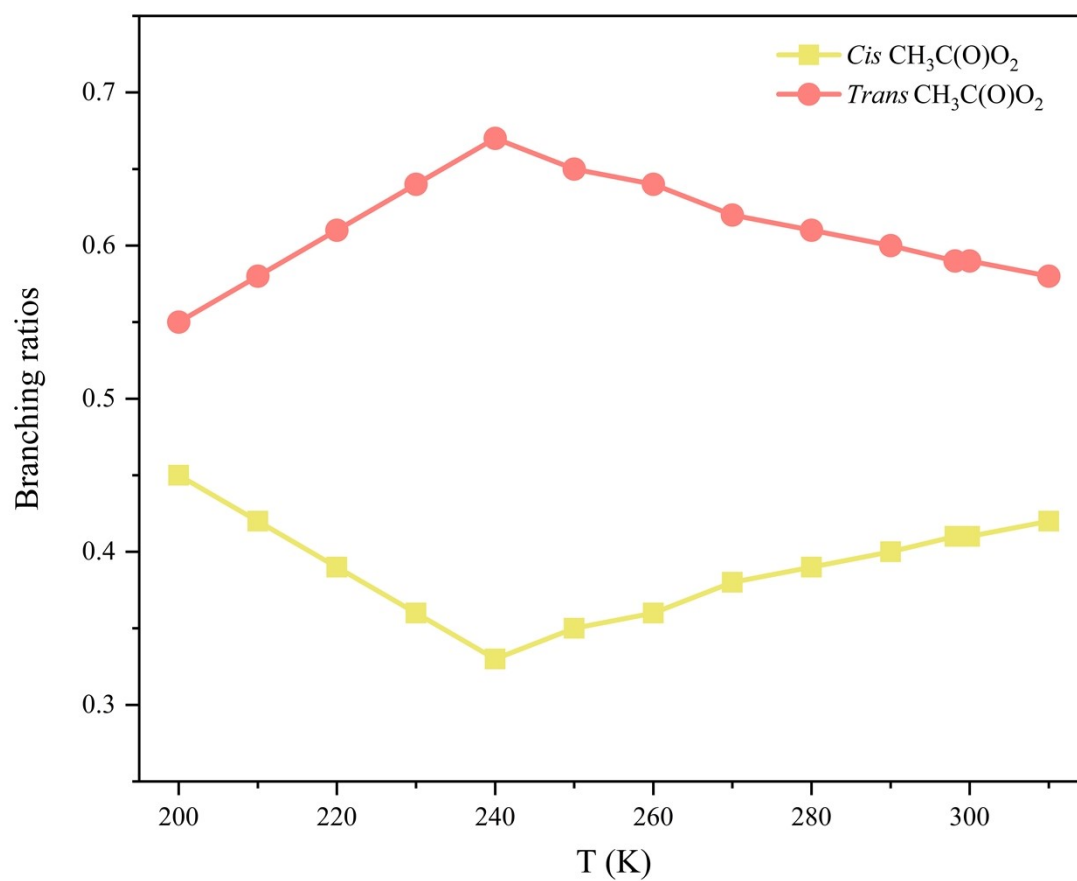

**Figure S2.** Branching ratios of *Cis*-CH<sub>3</sub>C(O)O<sub>2</sub> radical and *Trans*-CH<sub>3</sub>C(O)O<sub>2</sub> radical in the temperature range of 200–310 K at 1 atm.

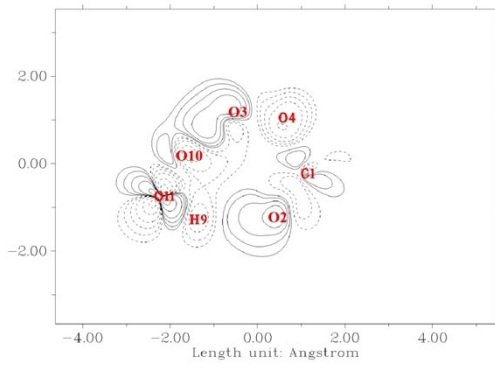

TS2

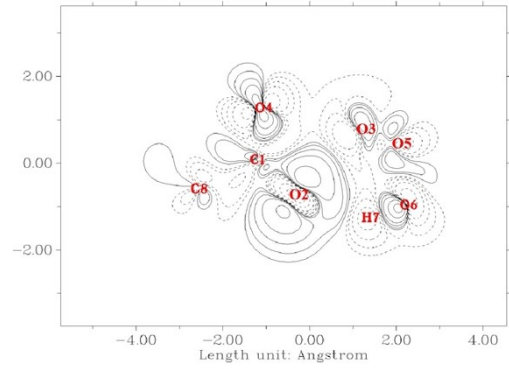

TS4

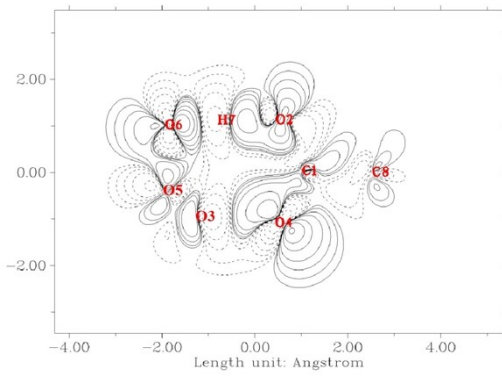

TS5

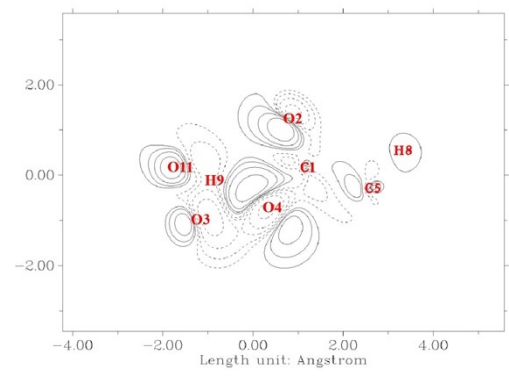

TS6

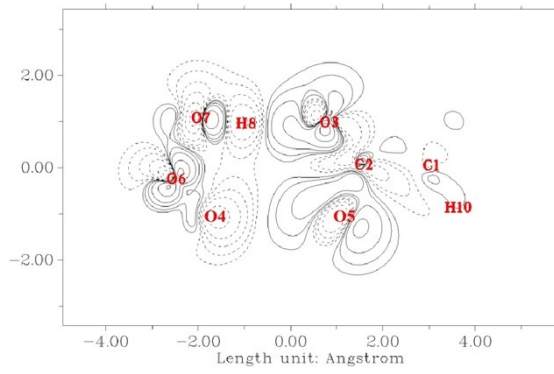

TS7

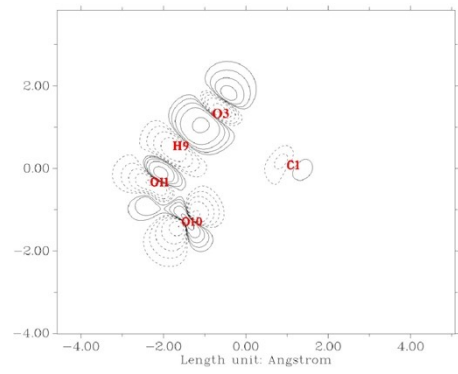

TS8

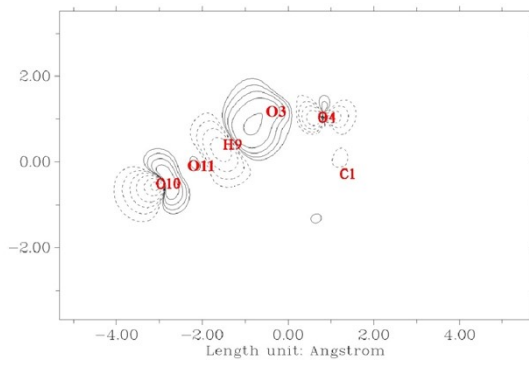

TS9

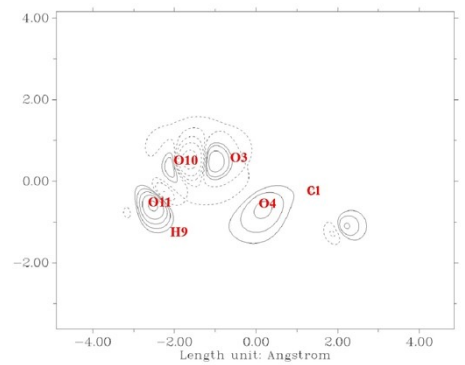

TS10

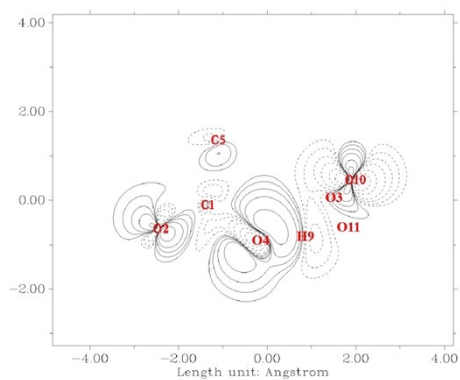

TS11

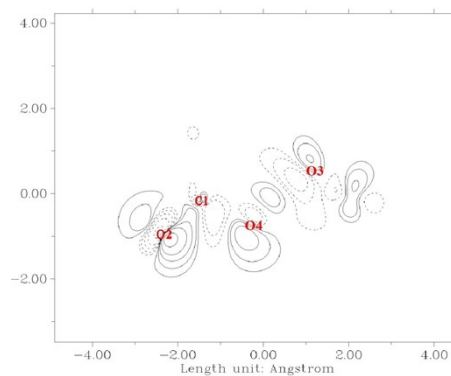

TS12

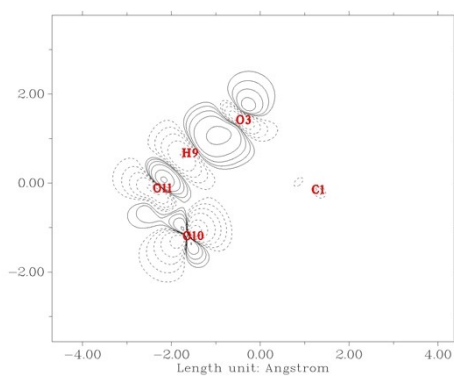

TS13

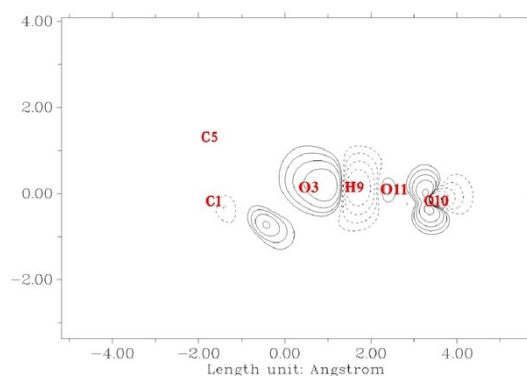

TS14

**Figure S3.** The contour maps of the electron density difference of key atoms in the transition states of the reaction of  $\text{CH}_3\text{C}(\text{O})\text{O}_2$  radical with  $\text{HO}_2$  radical. Among them, *Cis*- $\text{CH}_3\text{C}(\text{O})\text{O}_2$  related transition states include (TS2, TS4, TS5, TS6, TS7, TS8, TS9), and *Trans*- $\text{CH}_3\text{C}(\text{O})\text{O}_2$  related transition states include (TS10, TS11, TS12, TS13, TS14). Solid and dash lines correspond to positive and negative parts, respectively.

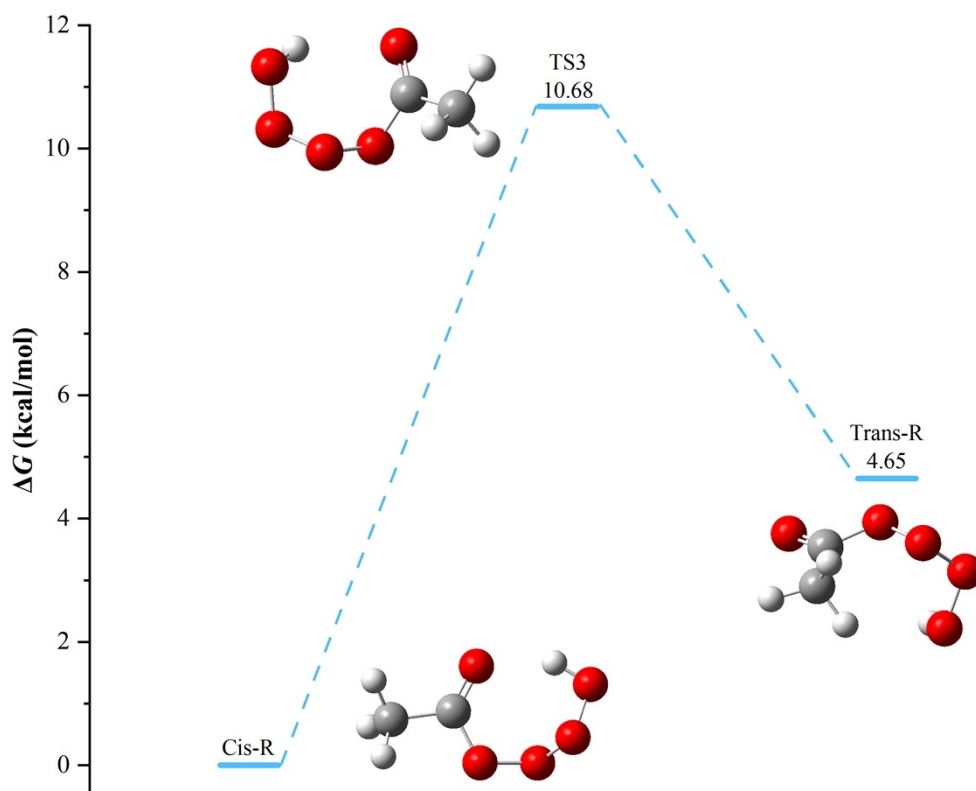

**Figure S4.** Potential energy surfaces for  $\text{CH}_3\text{C}(\text{O})\text{O}_4\text{H}$  isomerization reactions. The relative Gibbs free energy ( $\text{kcal mol}^{-1}$  at 298.15 K) was calculated at the CCSD(T)-F12/cc-pVTZ-F12// $\omega$ B97X-D/def2-TZVP level of theory.

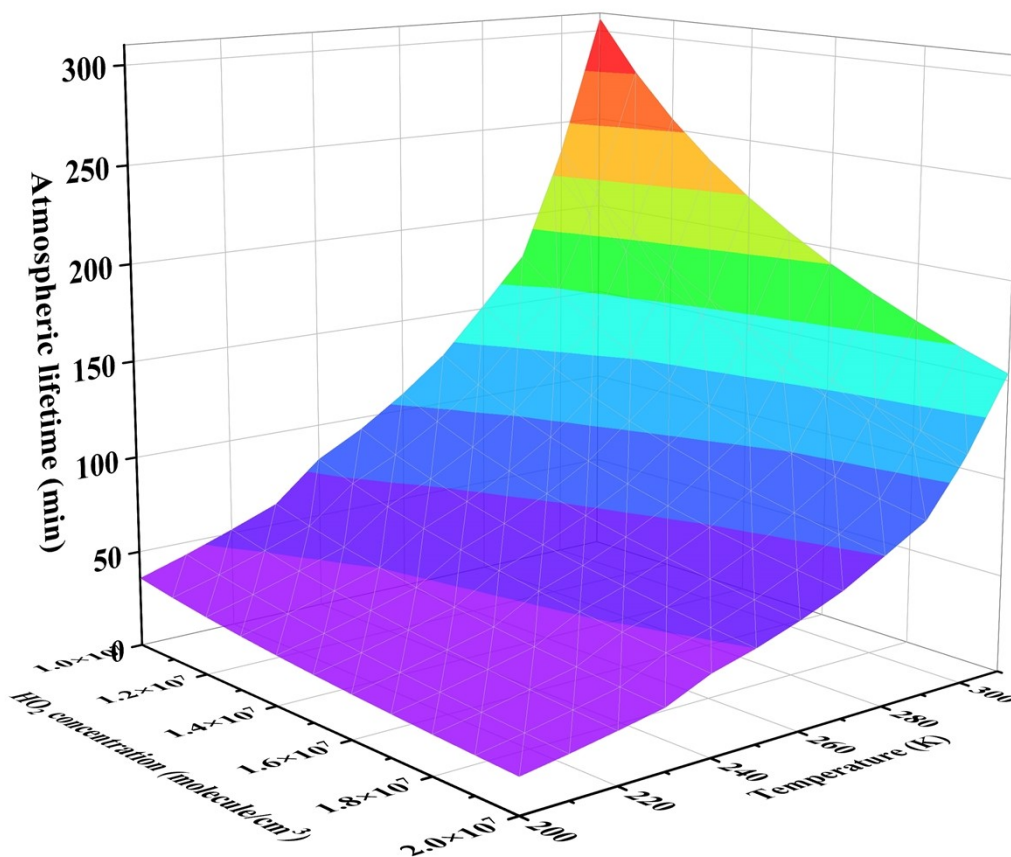

**Figure S5.** The atmospheric lifetime values ( $\tau$ , min) of the  $\text{CH}_3\text{C}(\text{O})\text{O}_2$  radical determined from the  $\text{HO}_2$  radical concentrations ( $[\text{HO}_2]$ ,  $1 \times 10^7 \sim 2 \times 10^7$  molecules  $\text{cm}^{-3}$ ) at different temperatures (200–310 K) in the atmosphere were calculated from apparent rate constants.

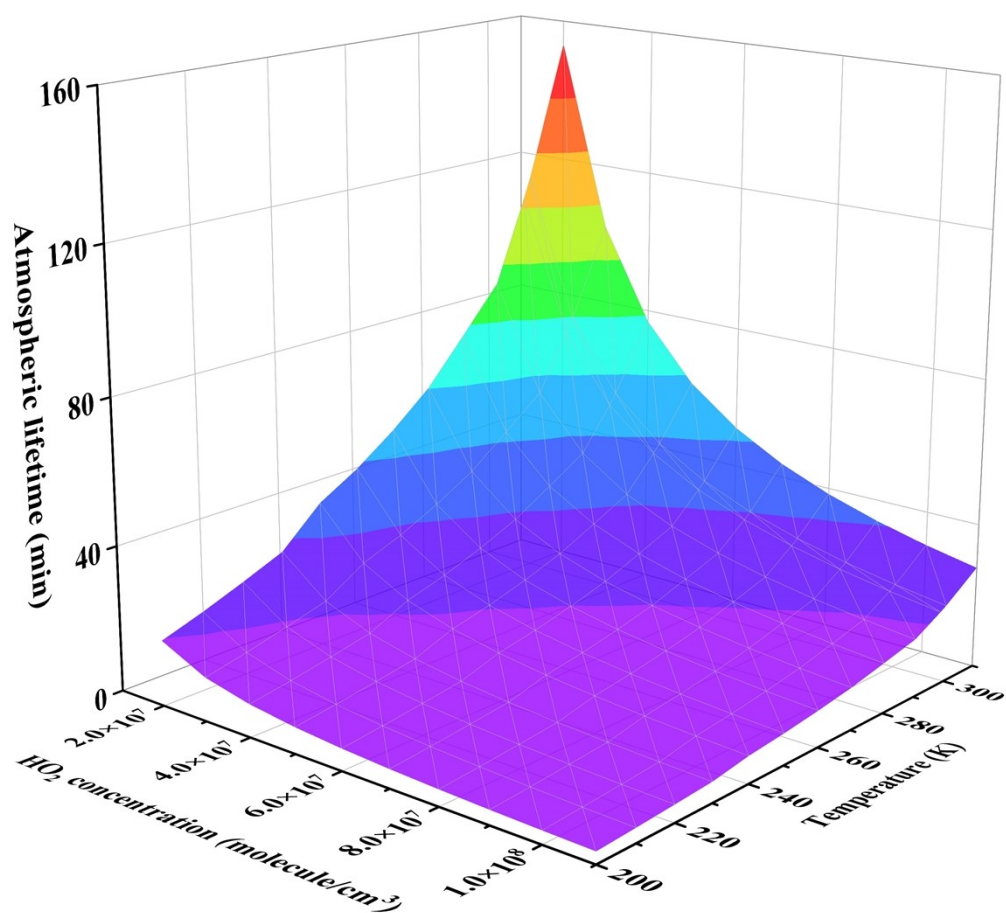

**Figure S6.** The atmospheric lifetime values ( $\tau$ , min) of the  $\text{CH}_3\text{C}(\text{O})\text{O}_2$  radical determined from the  $\text{HO}_2$  radical concentrations ( $[\text{HO}_2]$ ,  $0.2 \times 10^8 \sim 1.1 \times 10^8$  molecules  $\text{cm}^{-3}$ ) at different temperatures (200–310 K) in the atmosphere were calculated from apparent rate constants.

**Table S1.** Imaginary frequencies ( $\nu_{\text{im}}$ ) of the transition states (TSs) at the  $\omega$ B97X-D/def2-TZVP level of theory.

| Transition States | Imaginary frequencies ( $\nu_{\text{im}}$ ) in $\text{cm}^{-1}$ |
|-------------------|-----------------------------------------------------------------|
| TS1               | 126.95 <i>i</i>                                                 |
| TS2               | 338.62 <i>i</i>                                                 |
| TS3               | 109.66 <i>i</i>                                                 |
| TS4               | 352.07 <i>i</i>                                                 |
| TS5               | 947.41 <i>i</i>                                                 |
| TS6               | 468.80 <i>i</i>                                                 |
| TS7               | 86.09 <i>i</i>                                                  |
| TS8               | 517.35 <i>i</i>                                                 |
| TS9               | 971.64 <i>i</i>                                                 |
| TS10              | 397.95 <i>i</i>                                                 |
| TS11              | 785.85 <i>i</i>                                                 |
| TS12              | 282.95 <i>i</i>                                                 |
| TS13              | 579.58 <i>i</i>                                                 |
| TS14              | 1159.66 <i>i</i>                                                |

**Table S2.** Branching ratios of *Cis*-CH<sub>3</sub>C(O)O<sub>2</sub> (*Cis*-R) radical, *Trans*-CH<sub>3</sub>C(O)O<sub>2</sub> (*Trans*-R) radical and Complexes in the temperature range of 200–310 K and 1 atm.

| Temperatures (K) | <i>Cis</i> -R | <i>Trans</i> -R | RC1  | RC2  | RC3  | RC4  | RC5  | RC6  | RC7  | RC8  | RC9  |
|------------------|---------------|-----------------|------|------|------|------|------|------|------|------|------|
| 200              | 0.45          | 0.55            | 0.24 | 0.24 | 0.47 | 0.06 | 0.00 | 0.06 | 0.06 | 0.83 | 0.05 |
| 210              | 0.42          | 0.58            | 0.23 | 0.23 | 0.46 | 0.08 | 0.00 | 0.07 | 0.07 | 0.81 | 0.06 |
| 220              | 0.39          | 0.61            | 0.23 | 0.23 | 0.45 | 0.10 | 0.00 | 0.07 | 0.07 | 0.78 | 0.08 |
| 230              | 0.36          | 0.64            | 0.22 | 0.22 | 0.44 | 0.12 | 0.00 | 0.07 | 0.07 | 0.76 | 0.10 |
| 240              | 0.33          | 0.67            | 0.21 | 0.21 | 0.43 | 0.14 | 0.00 | 0.07 | 0.07 | 0.73 | 0.13 |
| 250              | 0.35          | 0.65            | 0.21 | 0.21 | 0.42 | 0.16 | 0.00 | 0.07 | 0.07 | 0.70 | 0.15 |
| 260              | 0.36          | 0.64            | 0.20 | 0.20 | 0.41 | 0.19 | 0.00 | 0.07 | 0.07 | 0.67 | 0.18 |
| 270              | 0.38          | 0.62            | 0.19 | 0.19 | 0.39 | 0.22 | 0.01 | 0.07 | 0.07 | 0.64 | 0.21 |
| 280              | 0.39          | 0.61            | 0.19 | 0.19 | 0.38 | 0.24 | 0.01 | 0.07 | 0.07 | 0.62 | 0.24 |
| 290              | 0.40          | 0.60            | 0.18 | 0.18 | 0.37 | 0.27 | 0.01 | 0.07 | 0.07 | 0.59 | 0.27 |
| 298.15           | 0.41          | 0.59            | 0.17 | 0.17 | 0.36 | 0.29 | 0.01 | 0.07 | 0.07 | 0.56 | 0.29 |
| 300              | 0.41          | 0.59            | 0.17 | 0.17 | 0.35 | 0.30 | 0.01 | 0.07 | 0.07 | 0.56 | 0.30 |
| 310              | 0.42          | 0.58            | 0.17 | 0.17 | 0.34 | 0.32 | 0.01 | 0.07 | 0.07 | 0.53 | 0.33 |

**Table S3.** Reaction rate constants for the isomerization of the  $\text{CH}_3\text{C}(\text{O})\text{O}_2$  radical in the temperature range of 200–310 K and 1 atm. Units of reaction rate constants:  $\text{s}^{-1}$ .

| Temperatures (K) | $k_1$ <i>Cis</i> - $\text{CH}_3(\text{O})\text{O}_2$<br>to <i>Trans</i> - $\text{CH}_3(\text{O})\text{O}_2$ | $k_4$ <i>Trans</i> - $\text{CH}_3(\text{O})\text{O}_2$<br>to <i>Cis</i> - $\text{CH}_3(\text{O})\text{O}_2$ |
|------------------|-------------------------------------------------------------------------------------------------------------|-------------------------------------------------------------------------------------------------------------|
| 200              | $3.40 \times 10^6$                                                                                          | $2.76 \times 10^6$                                                                                          |
| 210              | $6.41 \times 10^6$                                                                                          | $4.60 \times 10^6$                                                                                          |
| 220              | $1.14 \times 10^7$                                                                                          | $7.25 \times 10^6$                                                                                          |
| 230              | $1.94 \times 10^7$                                                                                          | $1.09 \times 10^7$                                                                                          |
| 240              | $3.15 \times 10^7$                                                                                          | $1.58 \times 10^7$                                                                                          |
| 250              | $4.91 \times 10^7$                                                                                          | $2.62 \times 10^7$                                                                                          |
| 260              | $7.41 \times 10^7$                                                                                          | $4.21 \times 10^7$                                                                                          |
| 270              | $1.09 \times 10^8$                                                                                          | $6.52 \times 10^7$                                                                                          |
| 280              | $1.55 \times 10^8$                                                                                          | $9.79 \times 10^7$                                                                                          |
| 290              | $2.15 \times 10^8$                                                                                          | $1.43 \times 10^8$                                                                                          |
| 298.15           | $2.77 \times 10^8$                                                                                          | $1.91 \times 10^8$                                                                                          |
| 300              | $2.93 \times 10^8$                                                                                          | $2.04 \times 10^8$                                                                                          |
| 310              | $3.91 \times 10^8$                                                                                          | $2.84 \times 10^8$                                                                                          |

**Table S4.** Rate constant of the favourable initial reaction of the  $\text{CH}_3\text{C}(\text{O})\text{O}_2$  radical with  $\text{HO}_2$  radical in the temperature range of 200–310 K and 1 atm. Units of reaction rate constants:  $\text{s}^{-1}$ .

| Temperatures (K) | $k_8$ (via TS2)       | $k_{10}$ (via TS8) | $k_{12}$ (via TS10) | $k_{14}$ (via TS13) |
|------------------|-----------------------|--------------------|---------------------|---------------------|
| 200              | $5.49 \times 10^9$    | $2.33 \times 10^9$ | $5.23 \times 10^7$  | $2.62 \times 10^8$  |
| 210              | $6.60 \times 10^9$    | $2.71 \times 10^9$ | $8.61 \times 10^7$  | $3.39 \times 10^8$  |
| 220              | $7.79 \times 10^9$    | $3.09 \times 10^9$ | $1.36 \times 10^8$  | $4.27 \times 10^8$  |
| 230              | $9.04 \times 10^9$    | $3.47 \times 10^9$ | $2.05 \times 10^8$  | $5.24 \times 10^8$  |
| 240              | $1.03 \times 10^{10}$ | $3.86 \times 10^9$ | $2.99 \times 10^8$  | $6.34 \times 10^8$  |
| 250              | $1.17 \times 10^{10}$ | $4.21 \times 10^9$ | $4.22 \times 10^8$  | $7.42 \times 10^8$  |
| 260              | $1.30 \times 10^{10}$ | $4.56 \times 10^9$ | $5.81 \times 10^8$  | $8.58 \times 10^8$  |
| 270              | $1.44 \times 10^{10}$ | $4.90 \times 10^9$ | $7.80 \times 10^8$  | $9.81 \times 10^8$  |
| 280              | $1.58 \times 10^{10}$ | $5.25 \times 10^9$ | $1.02 \times 10^9$  | $1.11 \times 10^9$  |
| 290              | $1.72 \times 10^{10}$ | $5.59 \times 10^9$ | $1.32 \times 10^9$  | $1.25 \times 10^9$  |
| 298.15           | $1.83 \times 10^{10}$ | $5.86 \times 10^9$ | $1.60 \times 10^9$  | $1.37 \times 10^9$  |
| 300              | $1.85 \times 10^{10}$ | $5.92 \times 10^9$ | $1.67 \times 10^9$  | $1.39 \times 10^9$  |
| 310              | $1.99 \times 10^{10}$ | $6.26 \times 10^9$ | $2.08 \times 10^9$  | $1.55 \times 10^9$  |

**Table S5.** Isomerisation and decomposition rate constants of the intermediate  $\text{CH}_3\text{C}(\text{O})\text{O}_4\text{H}$  in the temperature range of 200–310 K and 1 atm. Units of reaction rate constants:  $\text{s}^{-1}$ .

| Temperatures<br>(K) | $k_{16}$<br>(Via TS11, IM1 to IM2) | $k_{20}$<br>(Via TS11, IM2 to IM1) | $k_{17}$<br>(via TS15) | $k_{18}$<br>(via TS7) | $k_{22}$<br>(via TS12) |
|---------------------|------------------------------------|------------------------------------|------------------------|-----------------------|------------------------|
| 200                 | 9.57                               | $1.11 \times 10^6$                 | 10.2                   | 0.91                  | $7.04 \times 10^3$     |
| 210                 | 35.9                               | $2.39 \times 10^6$                 | 38.4                   | 5.03                  | $2.22 \times 10^4$     |
| 220                 | $1.19 \times 10^2$                 | $4.83 \times 10^6$                 | $1.28 \times 10^2$     | 24                    | $6.34 \times 10^4$     |
| 230                 | $3.59 \times 10^2$                 | $9.18 \times 10^6$                 | $3.87 \times 10^2$     | $1.01 \times 10^2$    | $1.66 \times 10^5$     |
| 240                 | $9.85 \times 10^2$                 | $1.66 \times 10^7$                 | $1.07 \times 10^3$     | $3.78 \times 10^2$    | $4.04 \times 10^5$     |
| 250                 | $2.50 \times 10^3$                 | $2.86 \times 10^7$                 | $2.71 \times 10^3$     | $1.28 \times 10^3$    | $9.18 \times 10^5$     |
| 260                 | $5.91 \times 10^3$                 | $4.74 \times 10^7$                 | $6.45 \times 10^3$     | $3.99 \times 10^3$    | $1.97 \times 10^6$     |
| 270                 | $1.31 \times 10^4$                 | $7.58 \times 10^7$                 | $1.44 \times 10^4$     | $1.15 \times 10^4$    | $4.01 \times 10^6$     |
| 280                 | $2.76 \times 10^4$                 | $1.17 \times 10^8$                 | $3.03 \times 10^4$     | $3.07 \times 10^4$    | $7.78 \times 10^6$     |
| 290                 | $5.53 \times 10^4$                 | $1.76 \times 10^8$                 | $6.09 \times 10^4$     | $7.72 \times 10^4$    | $1.45 \times 10^7$     |
| 298.15              | $9.40 \times 10^4$                 | $2.41 \times 10^8$                 | $1.04 \times 10^5$     | $1.57 \times 10^5$    | $2.34 \times 10^7$     |
| 300                 | $1.06 \times 10^5$                 | $2.58 \times 10^8$                 | $1.17 \times 10^5$     | $1.83 \times 10^5$    | $2.60 \times 10^7$     |
| 310                 | $1.94 \times 10^5$                 | $3.70 \times 10^8$                 | $2.15 \times 10^5$     | $4.13 \times 10^5$    | $4.49 \times 10^7$     |

**Table S6.** Branching ratios for the reactions of CH<sub>3</sub>C(O)O<sub>2</sub> radical with HO<sub>2</sub> radical in the temperature range of 200–310 K and 1 atm.

| Temperatures<br>(K) | $\alpha_{IM1}$<br>CH <sub>3</sub> C(O)O <sub>4</sub> H | $\alpha_{R1a}$<br>CH <sub>3</sub> C(O)O <sub>2</sub> H + O <sub>2</sub> | $\alpha_{R1b}$<br>CH <sub>3</sub> C(O)OH + O <sub>3</sub> | $\alpha_{R1c}$<br>CH <sub>3</sub> C(O)O + OH + O <sub>2</sub> | Total |
|---------------------|--------------------------------------------------------|-------------------------------------------------------------------------|-----------------------------------------------------------|---------------------------------------------------------------|-------|
| 200                 | 0.585                                                  | 0.17                                                                    | 0.22                                                      | 0.02                                                          | 0.99  |
| 210                 | 0.209                                                  | 0.22                                                                    | 0.49                                                      | 0.07                                                          | 0.99  |
| 220                 | 1.58E-02                                               | 0.27                                                                    | 0.59                                                      | 0.12                                                          | 0.99  |
| 230                 | 1.73E-03                                               | 0.30                                                                    | 0.54                                                      | 0.15                                                          | 0.99  |
| 240                 | 4.39E-04                                               | 0.33                                                                    | 0.48                                                      | 0.18                                                          | 0.99  |
| 250                 | 1.48E-04                                               | 0.33                                                                    | 0.45                                                      | 0.21                                                          | 0.99  |
| 260                 | 5.29E-05                                               | 0.35                                                                    | 0.39                                                      | 0.26                                                          | 0.99  |
| 270                 | 2.07E-05                                               | 0.36                                                                    | 0.34                                                      | 0.29                                                          | 0.99  |
| 280                 | 8.32E-06                                               | 0.36                                                                    | 0.31                                                      | 0.33                                                          | 0.99  |
| 290                 | 3.22E-06                                               | 0.35                                                                    | 0.27                                                      | 0.37                                                          | 0.99  |
| 298.15              | 1.41E-06                                               | 0.34                                                                    | 0.25                                                      | 0.40                                                          | 0.99  |
| 300                 | 1.13E-06                                               | 0.34                                                                    | 0.25                                                      | 0.41                                                          | 0.99  |
| 310                 | 5.02E-07                                               | 0.33                                                                    | 0.22                                                      | 0.45                                                          | 0.99  |

**Table S7.** The atmospheric lifetimes ( $\tau$ , min) of  $\text{CH}_3\text{C}(\text{O})\text{O}_2$  radical at different concentrations of  $\text{HO}_2$  radical ( $[\text{HO}_2]$ ,  $1 \times 10^7 \sim 2 \times 10^7$  molecule  $\text{cm}^{-3}$ ) in the temperature range of 200–310 K and 1 atm.

| T        | $[\text{HO}_2]$ |                   |                   |                   |                   |                   |                   |                   |                   |                   |                   |
|----------|-----------------|-------------------|-------------------|-------------------|-------------------|-------------------|-------------------|-------------------|-------------------|-------------------|-------------------|
|          | $1 \times 10^7$ | $1.1 \times 10^7$ | $1.2 \times 10^7$ | $1.3 \times 10^7$ | $1.4 \times 10^7$ | $1.5 \times 10^7$ | $1.6 \times 10^7$ | $1.7 \times 10^7$ | $1.8 \times 10^7$ | $1.9 \times 10^7$ | $2.0 \times 10^7$ |
| 200 K    | 035.91          | 32.65             | 29.92             | 27.62             | 25.65             | 23.94             | 22.44             | 21.12             | 19.95             | 18.90             | 17.95             |
| 210 K    | 43.50           | 39.54             | 36.25             | 33.46             | 31.07             | 29.00             | 27.18             | 25.59             | 24.16             | 22.89             | 21.75             |
| 220 K    | 52.01           | 47.29             | 43.34             | 40.01             | 37.15             | 34.68             | 32.51             | 30.60             | 28.90             | 27.38             | 26.01             |
| 230 K    | 61.13           | 55.57             | 50.94             | 47.02             | 43.67             | 40.75             | 38.21             | 35.96             | 33.96             | 32.17             | 30.57             |
| 240 K    | 81.33           | 73.93             | 67.77             | 62.56             | 58.09             | 54.22             | 50.83             | 47.84             | 45.18             | 42.80             | 40.66             |
| 250 K    | 93.79           | 85.26             | 78.16             | 72.15             | 66.99             | 62.53             | 58.62             | 55.17             | 52.11             | 49.36             | 46.89             |
| 260 K    | 109.27          | 99.33             | 91.06             | 84.05             | 78.05             | 72.85             | 68.29             | 64.28             | 60.70             | 57.51             | 54.63             |
| 270 K    | 127.36          | 115.78            | 106.14            | 97.97             | 90.97             | 84.91             | 79.60             | 74.92             | 70.76             | 67.03             | 63.68             |
| 280 K    | 151.59          | 137.81            | 126.33            | 116.61            | 108.28            | 101.06            | 94.75             | 89.17             | 84.22             | 79.79             | 75.80             |
| 290 K    | 176.56          | 160.51            | 147.14            | 135.82            | 126.12            | 117.71            | 110.35            | 103.86            | 98.09             | 92.93             | 88.28             |
| 298.15 K | 222.67          | 202.42            | 185.56            | 171.28            | 159.05            | 148.44            | 139.17            | 130.98            | 123.70            | 117.19            | 111.33            |
| 300 K    | 233.98          | 212.71            | 194.99            | 179.99            | 167.13            | 155.99            | 146.24            | 137.64            | 129.99            | 123.15            | 116.99            |

310 K      306.97    279.06    255.81    236.13    219.26    204.65    191.86    180.57    170.54    161.56    153.49

---

**Table S8.** The atmospheric lifetimes ( $\tau$ , min) of  $\text{CH}_3\text{C}(\text{O})\text{O}_2$  radical at different concentrations of  $\text{HO}_2$  radical ( $[\text{HO}_2]$ ,  $0.2 \times 10^8 \sim 1.1 \times 10^8$  molecule  $\text{cm}^{-3}$ ) in the temperature range of 200–310 K and 1 atm.

| $\tau$            | $0.2 \times 10^8$ | $0.3 \times 10^8$ | $0.4 \times 10^8$ | $0.5 \times 10^8$ | $0.6 \times 10^8$ | $0.7 \times 10^8$ | $0.8 \times 10^8$ | $0.9 \times 10^8$ | $1.0 \times 10^8$ | $1.1 \times 10^8$ |
|-------------------|-------------------|-------------------|-------------------|-------------------|-------------------|-------------------|-------------------|-------------------|-------------------|-------------------|
| [ $\text{HO}_2$ ] |                   |                   |                   |                   |                   |                   |                   |                   |                   |                   |
| 200 K             | 17.95             | 11.97             | 8.98              | 7.18              | 5.98              | 5.13              | 4.49              | 3.99              | 3.59              | 3.26              |
| 210 K             | 21.75             | 14.50             | 10.87             | 8.70              | 7.25              | 6.21              | 5.44              | 4.83              | 4.35              | 3.95              |
| 220 K             | 26.01             | 17.34             | 13.00             | 10.40             | 8.67              | 7.43              | 6.50              | 5.78              | 5.20              | 4.73              |
| 230 K             | 30.57             | 20.38             | 15.28             | 12.23             | 10.19             | 8.73              | 7.64              | 6.79              | 6.11              | 5.56              |
| 240 K             | 40.66             | 27.11             | 20.33             | 16.27             | 13.55             | 11.62             | 10.17             | 9.04              | 8.13              | 7.39              |
| 250 K             | 46.89             | 31.26             | 23.45             | 18.76             | 15.63             | 13.40             | 11.72             | 10.42             | 9.38              | 8.53              |
| 260 K             | 54.63             | 36.42             | 27.32             | 21.85             | 18.21             | 15.61             | 13.66             | 12.14             | 10.93             | 9.93              |
| 270 K             | 63.68             | 42.45             | 31.84             | 25.47             | 21.23             | 18.19             | 15.92             | 14.15             | 12.74             | 11.58             |
| 280 K             | 75.80             | 50.53             | 37.90             | 30.32             | 25.27             | 21.66             | 18.95             | 16.84             | 15.16             | 13.78             |
| 290 K             | 88.28             | 58.85             | 44.14             | 35.31             | 29.43             | 25.22             | 22.07             | 19.62             | 17.66             | 16.05             |
| 298.15 K          | 111.33            | 74.22             | 55.67             | 44.53             | 37.11             | 31.81             | 27.83             | 24.74             | 22.27             | 20.24             |
| 300 K             | 116.99            | 77.99             | 58.50             | 46.80             | 39.00             | 33.43             | 29.25             | 26.00             | 23.40             | 21.27             |
| 310 K             | 153.49            | 102.32            | 76.74             | 61.39             | 51.16             | 43.85             | 38.37             | 34.11             | 30.70             | 27.91             |

**Table S9.** The atmospheric lifetimes ( $\tau$ , min) of  $\text{CH}_3\text{C}(\text{O})\text{O}_2$  radical at different concentrations of  $\text{HO}_2$  radical ( $[\text{HO}_2]$ ,  $1.1 \times 10^8 \sim 6.4 \times 10^8$  molecule  $\text{cm}^{-3}$ ) in the temperature range of 200–310 K and 1 atm.

| T                           | $1.1 \times 10^8$ | $1.5 \times 10^8$ | $2.0 \times 10^8$ | $2.5 \times 10^8$ | $3.0 \times 10^8$ | $3.5 \times 10^8$ | $4.0 \times 10^8$ | $4.5 \times 10^8$ | $5.0 \times 10^8$ | $5.5 \times 10^8$ | $6.0 \times 10^8$ | $6.4 \times 10^8$ |
|-----------------------------|-------------------|-------------------|-------------------|-------------------|-------------------|-------------------|-------------------|-------------------|-------------------|-------------------|-------------------|-------------------|
| $\tau$<br>[ $\text{HO}_2$ ] |                   |                   |                   |                   |                   |                   |                   |                   |                   |                   |                   |                   |
| 200 K                       | 3.26              | 2.39              | 1.80              | 1.44              | 1.20              | 1.03              | 0.90              | 0.80              | 0.72              | 0.65              | 0.60              | 0.56              |
| 210 K                       | 3.95              | 2.90              | 2.17              | 1.74              | 1.45              | 1.24              | 1.09              | 0.97              | 0.87              | 0.79              | 0.72              | 0.68              |
| 220 K                       | 4.73              | 3.47              | 2.60              | 2.08              | 1.73              | 1.49              | 1.30              | 1.16              | 1.04              | 0.95              | 0.87              | 0.81              |
| 230 K                       | 5.56              | 4.08              | 3.06              | 2.45              | 2.04              | 1.75              | 1.53              | 1.36              | 1.22              | 1.11              | 1.02              | 0.96              |
| 240 K                       | 7.39              | 5.42              | 4.07              | 3.25              | 2.71              | 2.32              | 2.03              | 1.81              | 1.63              | 1.48              | 1.36              | 1.27              |
| 250 K                       | 8.53              | 6.25              | 4.69              | 3.75              | 3.13              | 2.68              | 2.34              | 2.08              | 1.88              | 1.71              | 1.56              | 1.47              |
| 260 K                       | 9.93              | 7.28              | 5.46              | 4.37              | 3.64              | 3.12              | 2.73              | 2.43              | 2.19              | 1.99              | 1.82              | 1.71              |
| 270 K                       | 11.58             | 8.49              | 6.37              | 5.09              | 4.25              | 3.64              | 3.18              | 2.83              | 2.55              | 2.32              | 2.12              | 1.99              |
| 280 K                       | 13.78             | 10.11             | 7.58              | 6.06              | 5.05              | 4.33              | 3.79              | 3.37              | 3.03              | 2.76              | 2.53              | 2.37              |
| 290 K                       | 16.05             | 11.77             | 8.83              | 7.06              | 5.89              | 5.04              | 4.41              | 3.92              | 3.53              | 3.21              | 2.94              | 2.76              |
| 298.15 K                    | 20.24             | 14.84             | 11.13             | 8.91              | 7.42              | 6.36              | 5.57              | 4.95              | 4.45              | 4.05              | 3.71              | 3.48              |

|       |       |       |       |       |       |      |      |      |      |      |      |      |
|-------|-------|-------|-------|-------|-------|------|------|------|------|------|------|------|
| 300 K | 21.27 | 15.60 | 11.70 | 9.36  | 7.80  | 6.69 | 5.85 | 5.20 | 4.68 | 4.25 | 3.90 | 3.66 |
| 310 K | 27.91 | 20.46 | 15.35 | 12.28 | 10.23 | 8.77 | 7.67 | 6.82 | 6.14 | 5.58 | 5.12 | 4.80 |

---

**Table S10.** The acute and chronic toxicity class. (Unit: mg L<sup>-1</sup>)

| Classification | Acute toxicity <sup>1</sup> | Chronic toxicity <sup>2</sup> |
|----------------|-----------------------------|-------------------------------|
| Not harmful    | EC50 / LC50 > 100           | ChV > 10                      |
| Harmful        | 10 < LC50 / EC50 < 100      | 1 < ChV < 10                  |
| Toxic          | 1 < LC50 / EC50 < 10        | 0.1 < ChV < 1                 |
| Very toxic     | LC50 / EC50 < 1             | ChV < 0.1                     |

<sup>1</sup>Criteria set by the European Union (described in Annex VI of Directive 67/548/EEC);

<sup>2</sup>Criteria set by the Chinese hazard evaluation guidelines for new chemical substances (HJ/T 154–2004).

**Table S11.** Ecotoxicity (logLC50, logEC50 and logChV) for CH<sub>3</sub>C(O)O<sub>2</sub> radical precursors and its degradation products. (Unit: mg L<sup>-1</sup>)

| Toxicity            | Species     | Acetone | Methylglyoxal | Acetaldehyde | Isoprene | Peracetic acid | Oxygen | Acetic acid | Ozone |
|---------------------|-------------|---------|---------------|--------------|----------|----------------|--------|-------------|-------|
| Acute<br>Toxicity   | Fish        | 3.69    | 2.31          | 1.46         | 1.23     | 4.56           | 2.63   | 4.41        | 4.17  |
|                     | Daphnid     | 3.35    | 2.42          | 1.51         | 1.00     | 4.19           | 2.33   | 4.09        | 3.81  |
|                     | Green algae | 2.85    | 2.02          | 1.18         | 0.97     | 3.55           | 1.98   | 3.64        | 3.21  |
| Chronic<br>Toxicity | Fish        | 2.57    | 2.22          | 1.08         | 0.24     | 3.40           | 1.56   | 3.31        | 3.03  |
|                     | Daphnid     | 2.09    | 0.18          | -0.62        | 0.06     | 2.83           | 1.17   | 2.86        | 2.48  |
|                     | Green algae | 2.07    | 1.37          | 0.62         | 0.44     | 2.69           | 1.28   | 2.89        | 2.37  |

**Table S12.** Cartesian coordinates of all the studied gaseous molecules optimized at the  $\omega$ B97X-D/def2-TZVP level of theory.

***Cis-CH<sub>3</sub>C(O)O<sub>2</sub>*** :

| Atoms | X           | Y           | Z           |
|-------|-------------|-------------|-------------|
| C     | 0.40328900  | 0.22534200  | 0.00001300  |
| O     | 0.22437900  | 1.38916900  | 0.00001200  |
| O     | -1.85524000 | -0.15541500 | -0.00012800 |
| O     | -0.67849900 | -0.71519100 | -0.00008300 |
| C     | 1.68151700  | -0.54538800 | 0.00014900  |
| H     | 1.72448800  | -1.18783200 | 0.88031200  |
| H     | 1.72438600  | -1.18840500 | -0.87959500 |
| H     | 2.51716100  | 0.14801300  | -0.00010400 |

***Trans-CH<sub>3</sub>C(O)O<sub>2</sub>*** :

| Atoms | X           | Y           | Z           |
|-------|-------------|-------------|-------------|
| C     | -0.54418000 | -0.13433400 | -0.00000600 |
| O     | -1.46124600 | -0.87890800 | -0.00001500 |
| O     | 1.74506600  | 0.07500300  | 0.00001700  |
| O     | 0.74276500  | -0.75836900 | -0.00001300 |
| C     | -0.55046100 | 1.35698200  | 0.00001100  |
| H     | -0.02932100 | 1.73950100  | 0.87676700  |
| H     | -0.02921700 | 1.73953300  | -0.87666800 |
| H     | -1.58628900 | 1.68327100  | -0.00003900 |

**HO<sub>2</sub>** :

| Atoms | X           | Y           | Z          |
|-------|-------------|-------------|------------|
| H     | -0.88041600 | -0.86497600 | 0.00000000 |
| O     | 0.05502600  | 0.70892500  | 0.00000000 |
| O     | 0.05502600  | -0.60080300 | 0.00000000 |

***Cis-CH<sub>3</sub>C(O)O<sub>4</sub>H :***

---

| Atoms | X           | Y           | Z           |
|-------|-------------|-------------|-------------|
| C     | -1.08920400 | 0.20607600  | -0.04281500 |
| O     | -0.54617300 | 1.25779100  | -0.22833900 |
| O     | 0.88761400  | -0.99557000 | -0.47204200 |
| O     | -0.46975700 | -0.99759500 | -0.01360300 |
| O     | 1.68728300  | -0.41124300 | 0.49416500  |
| O     | 2.10869700  | 0.83141000  | 0.01475200  |
| H     | 1.27045100  | 1.33481400  | 0.00067000  |
| C     | -2.55536200 | 0.00870900  | 0.19822700  |
| H     | -3.03864100 | -0.14630400 | -0.76810400 |
| H     | -2.74467600 | -0.86308200 | 0.82041700  |
| H     | -2.96104600 | 0.90752600  | 0.65508500  |

---

***Trans-CH<sub>3</sub>C(O)O<sub>4</sub>H :***

---

| Atoms | X           | Y           | Z           |
|-------|-------------|-------------|-------------|
| C     | -1.28623100 | -0.11395200 | 0.06837400  |
| O     | -2.15555300 | -0.63724100 | 0.68861400  |
| O     | 0.81992000  | -0.23264900 | -0.93865800 |
| O     | -0.22866300 | -0.93791000 | -0.27656100 |
| C     | -1.24715100 | 1.31015800  | -0.39113800 |
| H     | -0.39575500 | 1.82969700  | 0.04618700  |
| H     | -1.13864500 | 1.36013600  | -1.47431800 |
| H     | -2.17704900 | 1.78009200  | -0.08457000 |
| H     | 1.50515100  | 0.06508600  | 1.62943200  |
| O     | 1.92449200  | -0.33230500 | -0.14187600 |
| O     | 1.81562700  | 0.61357500  | 0.89596200  |

---

***Cis-CH<sub>3</sub>C(O)O<sub>2</sub>H :***

| Atoms | X           | Y           | Z           |
|-------|-------------|-------------|-------------|
| C     | -1.78341600 | -0.42092400 | -0.00006500 |
| C     | -0.40827100 | 0.16545000  | -0.00021000 |
| O     | -0.12476100 | 1.33514600  | 0.00013300  |
| O     | 0.53250700  | -0.79113300 | -0.00019500 |
| H     | -2.31419100 | -0.05726000 | -0.87936100 |
| H     | -1.75839700 | -1.50764600 | -0.00401100 |
| H     | -2.31108400 | -0.06390900 | 0.88385400  |
| O     | 1.83079200  | -0.23876400 | 0.00021200  |
| H     | 1.62548500  | 0.71967000  | -0.00003000 |

***Trans-CH<sub>3</sub>C(O)O<sub>2</sub>H :***

| Atoms | X           | Y           | Z           |
|-------|-------------|-------------|-------------|
| C     | 0.58563729  | -0.13473298 | 0.00288968  |
| O     | 1.56025288  | -0.82076863 | 0.01479145  |
| O     | -1.72190215 | 0.09053643  | -0.06879865 |
| O     | -0.61084785 | -0.79847651 | -0.03340963 |
| C     | 0.55365486  | 1.36264885  | 0.00956803  |
| H     | 0.04021297  | 1.73800146  | -0.87511198 |
| H     | 0.01064641  | 1.73134785  | 0.87891911  |
| H     | 1.58067120  | 1.71519366  | 0.02797413  |
| H     | -2.28730655 | -0.32236851 | 0.59280714  |

***O<sub>2</sub>:***

| Atoms | X          | Y          | Z           |
|-------|------------|------------|-------------|
| O     | 0.00000000 | 0.00000000 | 0.59727200  |
| O     | 0.00000000 | 0.00000000 | -0.59727200 |

**CH<sub>3</sub>COOH :**

| Atoms | X           | Y           | Z           |
|-------|-------------|-------------|-------------|
| C     | -0.09073000 | 0.12447700  | -0.00003000 |
| H     | -1.72193300 | -0.79065000 | 0.00006200  |
| C     | 1.38850400  | -0.12102000 | 0.00000000  |
| H     | 1.66417800  | -0.70416200 | -0.87904200 |
| H     | 1.91562500  | 0.82819500  | -0.00039700 |
| O     | -0.78678500 | -1.02841100 | 0.00002400  |
| O     | -0.62680500 | 1.19706900  | -0.00002200 |
| H     | 1.66421300  | -0.70339500 | 0.87954400  |

**O<sub>3</sub> :**

| Atoms | X          | Y           | Z           |
|-------|------------|-------------|-------------|
| O     | 0.00000000 | 0.00000000  | 0.42425403  |
| O     | 0.00000000 | 1.06179308  | -0.21212702 |
| O     | 0.00000000 | -1.06179308 | -0.21212702 |

**CH<sub>3</sub>C(O)O :**

| Atoms | X           | Y           | Z           |
|-------|-------------|-------------|-------------|
| C     | -1.38562300 | 0.00005500  | -0.00322400 |
| C     | 0.10102700  | -0.00026200 | -0.00798400 |
| O     | 0.80981400  | -1.02833100 | 0.00149200  |
| O     | 0.80981900  | 1.02844900  | 0.00152300  |
| H     | -1.72761300 | 0.00179200  | 1.03330200  |
| H     | -1.76077300 | 0.89534300  | -0.49668200 |
| H     | -1.76110400 | -0.89683200 | -0.49349800 |

**HO<sub>3</sub> :**

---

| Atoms | X           | Y           | Z           |
|-------|-------------|-------------|-------------|
| O     | 1.09085300  | 0.29615800  | 0.00012300  |
| O     | 0.15993600  | -0.53459000 | -0.00018100 |
| O     | -1.14128100 | 0.10814900  | 0.00020700  |
| H     | -0.87606100 | 1.04226600  | -0.00119600 |

---

**OH:**

---

| Atoms | X          | Y          | Z           |
|-------|------------|------------|-------------|
| H     | 0.00000000 | 0.00000000 | -0.86309200 |
| O     | 0.00000000 | 0.00000000 | 0.10788700  |

---

**Table S13.** Calculated spin contamination  $\langle S^2 \rangle$  values for open-shell key species involved in the reaction pathways.

| Species                                          | $\langle S^2 \rangle$ | $\langle S^2 \rangle$ |
|--------------------------------------------------|-----------------------|-----------------------|
|                                                  | Before annihilation   | After annihilation    |
| <i>Cis</i> -CH <sub>3</sub> C(O)O <sub>2</sub>   | 0.754                 | 0.750                 |
| <i>Trans</i> -CH <sub>3</sub> C(O)O <sub>2</sub> | 0.755                 | 0.750                 |
| HO <sub>2</sub>                                  | 0.754                 | 0.750                 |
| TS1                                              | 0.754                 | 0.750                 |
| TS8                                              | 2.012                 | 2.000                 |
| TS9                                              | 2.012                 | 2.000                 |
| TS13                                             | 2.013                 | 2.000                 |
| TS14                                             | 2.013                 | 2.000                 |
| CH <sub>3</sub> C(O)O                            | 0.758                 | 0.750                 |
| HO <sub>3</sub>                                  | 0.755                 | 0.750                 |
| OH                                               | 0.753                 | 0.750                 |
| O <sub>2</sub>                                   | 2.010                 | 2.000                 |
